# Supplementary material for: Efficiency of liquid tin(ii)n-alkoxide initiators in the ring-opening polymerization ofl-lactide: kinetic studies by non-isothermal differential scanning calorimetry
Source: Royal Society of Chemistry journal article supplement (doi:10.1039/d0ra07635j), 2020-01-01
Supplement: d0ra07635j1.pdf [file d0ra07635j1.pdf]

## Supplementary Data

### 1. Coordination-insertion mechanism of L-lactide ring-opening polymerization using liquid Sn(OR)<sub>2</sub> as an initiator

From the kinetic investigations by using non-isothermal DSC methods, the proposed coordination-insertion mechanism of the ring-opening polymerization in bulk using liquid tin(II) *n*-alkoxides (Sn(OR)<sub>2</sub>) can be shown in Fig. 1.

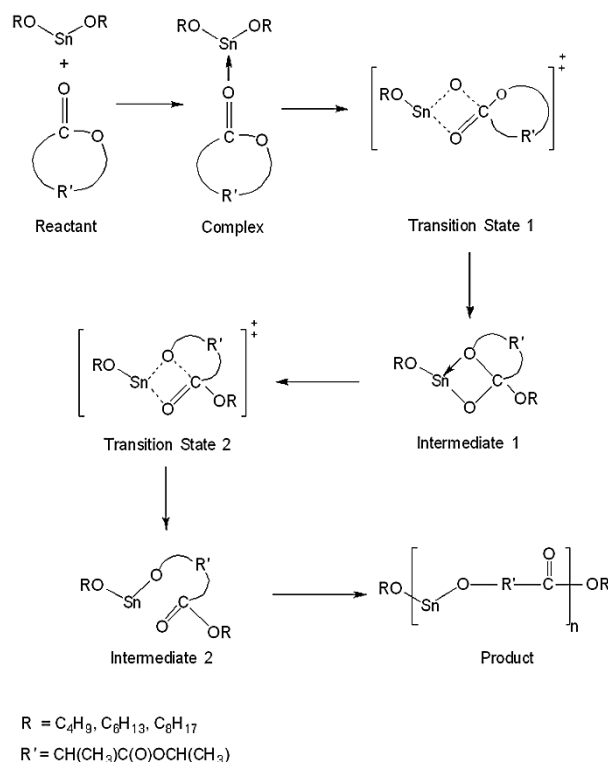

**Fig. 1** Coordination-insertion proposed mechanism for the ring-opening polymerization (ROP) in bulk of L-lactide cyclic ester monomer initiated by liquid tin(II) *n*-alkoxides.

### 2. Characterization of poly(L-lactide) using liquid tin(II) *n*-butoxide as an initiator

#### 2.1. Qualitative structural characterization by FTIR

Fig. 2 shows a typical FTIR spectrum of one of the purified poly(L-lactide) products and the major vibrational peak assignments are listed in Table 1.

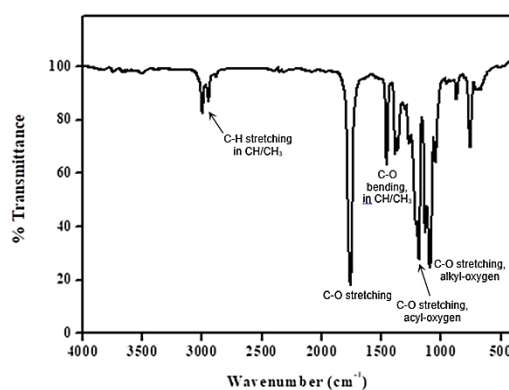

**Fig. 2** FTIR spectrum of purified poly(L-lactide) synthesized by using 0.1 mol% liquid Sn(OR)<sub>2</sub> as an initiator at 120 °C for 24 h.

**Table 1** FTIR major vibrational peak assignments for purified poly(l-lactide) synthesized by using 0.1 mol% liquid  $\text{Sn}(\text{OnC}_4\text{H}_9)_2$  as an initiator at 120 °C for 24 h.

| Vibrational assignments               | Band intensity* | Wavenumber ( $\text{cm}^{-1}$ ) |
|---------------------------------------|-----------------|---------------------------------|
| C-H stretching, in CH/CH <sub>3</sub> | m               | 2997, 2946                      |
| C-O bending                           | s               | 1758                            |
| C-H bending, in CH/CH <sub>3</sub>    | s               | 1454, 1383                      |
| C-O stretching, acyl-oxygen           | s               | 1267                            |
| C-O stretching, alkyl-oxygen          | s               | 1096                            |

\*w = weak, m = medium, s = strong

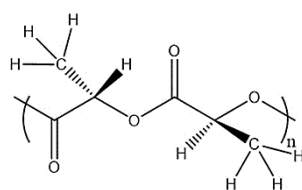

Poly(l-lactide), PLLA

## 2.2. Microstructural characterization by <sup>1</sup>H-NMR

A typical <sup>1</sup>H-NMR spectrum of a poly(l-lactide) in deuterated chloroform solution at room temperature including the peak assignments for the various protons of polymer structure were shown in Fig. 3 and the chemical shifts of the various peaks are given in Table 2.

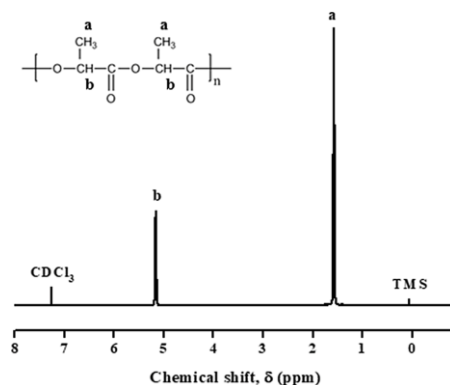

**Fig. 3** 400 MHz <sup>1</sup>H-NMR spectrum of purified poly(l-lactide) synthesised by using 0.1 mol% liquid tin(II) *n*-butoxide ( $\text{Sn}(\text{OnC}_4\text{H}_9)_2$ ) as an initiator at 120 °C for 24 h.

**Table 2** Proton assignments and chemical shifts ( $\delta$ , ppm) of the <sup>1</sup>H-NMR spectrum of poly(l-lactide) synthesized by using 0.1 mol% liquid  $\text{Sn}(\text{OnC}_4\text{H}_9)_2$  as an initiator at 120 °C for 24 h.

| Proton assignments | Peak multiplicity | Chemical shift ( $\delta$ , ppm) |
|--------------------|-------------------|----------------------------------|
| a                  | doublet           | 1.59                             |
| b                  | quartet           | 5.06                             |
